# Supplementary material for: Echocardiographic evaluation of cardiac function in cynomolgus monkeys over a wide age range
Source: PubMed Central journal article supplement — Exp Anim. 2020 Mar 13;69(3):336–44. doi: 10.1538/expanim.19-0128 (PMC7445060; doi:10.1538/expanim.19-0128), 2020-03-13
Supplement: expanim-69-336-s001.pdf [file expanim-69-336-s001.pdf]

**Supplementary Table S1. Sex differences in cardiac structures.**

|             | All age     |             |         | Immature    |             |         | Mature      |             |         | Elderly     |             |         |
|-------------|-------------|-------------|---------|-------------|-------------|---------|-------------|-------------|---------|-------------|-------------|---------|
|             | Male        | Female      | p value |
|             | Mean ± SD   |             |         | Mean ± SD   |             |         | Mean ± SD   |             |         | Mean ± SD   |             |         |
| LAD (cm)    | 1.43 ± 0.24 | 1.27 ± 0.23 | ***     | 1.35 ± 0.21 | 1.22 ± 0.23 | *       | 1.54 ± 0.24 | 1.32 ± 0.24 | ***     | 1.43 ± 0.26 | 1.24 ± 0.20 | *       |
| AOD (cm)    | 0.89 ± 0.18 | 0.87 ± 0.19 |         | 0.82 ± 0.13 | 0.73 ± 0.14 | **      | 0.94 ± 0.18 | 0.91 ± 0.19 |         | 1.04 ± 0.23 | 0.93 ± 0.18 |         |
| LA/Ao ratio | 1.65 ± 0.28 | 1.51 ± 0.29 | ***     | 1.67 ± 0.29 | 1.72 ± 0.29 |         | 1.67 ± 0.26 | 1.48 ± 0.23 | ***     | 1.47 ± 0.26 | 1.36 ± 0.27 |         |
| IVSd (cm)   | 0.48 ± 0.11 | 0.45 ± 0.13 |         | 0.45 ± 0.11 | 0.40 ± 0.09 | *       | 0.48 ± 0.09 | 0.47 ± 0.15 |         | 0.59 ± 0.16 | 0.45 ± 0.09 | *       |
| IVSs (cm)   | 0.65 ± 0.15 | 0.60 ± 0.15 | **      | 0.63 ± 0.16 | 0.54 ± 0.09 | **      | 0.67 ± 0.13 | 0.61 ± 0.19 |         | 0.76 ± 0.18 | 0.61 ± 0.11 |         |
| LVIDd (cm)  | 1.75 ± 0.34 | 1.55 ± 0.29 | ***     | 1.59 ± 0.31 | 1.43 ± 0.26 | *       | 1.97 ± 0.25 | 1.61 ± 0.28 | ***     | 1.61 ± 0.27 | 1.55 ± 0.32 |         |
| LVIDs (cm)  | 1.13 ± 0.27 | 0.96 ± 0.21 | ***     | 1.02 ± 0.21 | 0.92 ± 0.18 | *       | 1.29 ± 0.26 | 0.98 ± 0.21 | ***     | 1.00 ± 0.24 | 0.95 ± 0.24 |         |
| LVPWd (cm)  | 0.45 ± 0.12 | 0.42 ± 0.13 |         | 0.41 ± 0.11 | 0.35 ± 0.09 | *       | 0.47 ± 0.11 | 0.44 ± 0.13 |         | 0.55 ± 0.17 | 0.47 ± 0.14 |         |
| LVPWs (cm)  | 0.59 ± 0.11 | 0.59 ± 0.15 |         | 0.56 ± 0.10 | 0.51 ± 0.12 | *       | 0.63 ± 0.12 | 0.61 ± 0.14 |         | 0.62 ± 0.06 | 0.61 ± 0.17 |         |

\*p < 0.05, \*\*p < 0.01, \*\*\*p < 0.001.

IVSd, interventricular septum at diastole; IVSs, interventricular septum at systole; LA/AO,

left atrium/aorta diameter; LVIDd, left ventricular inner dimension at diastole; LVIDs, left ventricular inner dimension at systole; LVPWd, left ventricular posterior wall thickness at diastole;

LVPWs, left ventricular posterior wall thickness at systole.

**Supplementary Table S2. Sex differences in cardiac function and inflow velocity.**

|                           | All age      |              |         | Immature     |              |         | Mature        |              |         | Elderly      |              |         |
|---------------------------|--------------|--------------|---------|--------------|--------------|---------|---------------|--------------|---------|--------------|--------------|---------|
|                           | Male         | Female       | p value | Male         | Female       | p value | Male          | Female       | p value | Male         | Female       | p value |
|                           | Mean ± SD    |              |         | Mean ± SD    |              |         | Mean ± SD     |              |         | Mean ± SD    |              |         |
| SV (ml)                   | 4.86 ± 2.51  | 3.44 ± 2.02  | ***     | 3.53 ± 1.63  | 2.56 ± 1.16  | **      | 6.58 ± 2.48   | 3.87 ± 1.80  | ***     | 4.43 ± 1.75  | 3.45 ± 2.72  |         |
| CO (l/min)                | 0.67 ± 0.36  | 0.55 ± 0.34  | **      | 0.51 ± 0.27  | 0.41 ± 0.17  | *       | 0.86 ± 0.38   | 0.59 ± 0.27  | ***     | 0.68 ± 0.29  | 0.60 ± 0.51  |         |
| EF (%)                    | 72.03 ± 9.20 | 75.55 ± 8.77 | **      | 74.36 ± 6.97 | 72.34 ± 7.58 |         | 68.69 ± 10.77 | 77.04 ± 8.99 | ***     | 74.09 ± 7.33 | 75.68 ± 8.55 |         |
| FS (%)                    | 36.31 ± 6.73 | 38.96 ± 8.20 | **      | 37.34 ± 6.18 | 35.69 ± 5.66 |         | 34.52 ± 7.01  | 40.53 ± 8.86 | ***     | 38.82 ± 6.16 | 38.99 ± 7.94 |         |
| AV outflow velocity (m/s) | 0.81 ± 0.19  | 0.77 ± 0.16  |         | 0.83 ± 0.19  | 0.81 ± 0.13  |         | 0.77 ± 0.18   | 0.75 ± 0.14  |         | 0.8 ± 0.22   | 0.75 ± 0.20  |         |
| PV outflow velocity (m/s) | 0.87 ± 0.18  | 0.94 ± 0.22  | *       | 0.90 ± 0.17  | 0.94 ± 0.22  |         | 0.82 ± 0.20   | 0.90 ± 0.19  | *       | 0.91 ± 0.12  | 1.02 ± 0.24  |         |
| E wave of MV (m/s)        | 0.73 ± 0.21  | 0.70 ± 0.20  |         | 0.79 ± 0.21  | 0.81 ± 0.18  |         | 0.68 ± 0.18   | 0.65 ± 0.17  |         | 0.55 ± 0.18  | 0.70 ± 0.22  |         |
| A wave of MV (m/s)        | 0.49 ± 0.16  | 0.55 ± 0.15  |         | 0.54 ± 0.15  | 0.51 ± 0.17  |         | 0.47 ± 0.16   | 0.54 ± 0.15  |         | 0.40 ± 0.13  | 0.63 ± 0.13  | *       |
| E/A                       | 1.36 ± 0.35  | 1.25 ± 0.55  |         | 1.34 ± 0.31  | 1.75 ± 0.67  | *       | 1.40 ± 0.40   | 1.16 ± 0.36  | *       | 1.23 ± 0.18  | 0.78 ± 0.14  | **      |
| TV inflow velocity (m/s)  | 0.39 ± 0.29  | 0.38 ± 0.31  |         | 0.49 ± 0.29  | 0.45 ± 0.28  |         | 0.31 ± 0.26   | 0.38 ± 0.33  |         | 0.25 ± 0.27  | 0.33 ± 0.29  |         |

\*p < 0.05, \*\*p < 0.01, \*\*\*p < 0.001.

A wave of MV, atrial wave of mitral valve; AV outflow velocity, aorta valve outflow velocity; CO, cardiac output; E wave of MV, early wave of mitral valve; EF, ejection fraction; FS, fractional shortening of left ventricle; PV outflow velocity, pulmonary valve outflow velocity; TV inflow velocity, tricuspid valve inflow velocity.
